# Supplementary material for: Evaluation and Validation of the Roche Elecsys SARS-CoV-2 Antigen Electro-Chemiluminescent Immunoassay in a Southeast Asian Region
Source: MDPI journal article supplement (doi:10.3390/vaccines10020198), 2022-01-27
Supplement: s1 [file s1]

**Supplementary Table S1: STARD checklist**

| Section & Topic          | No         | Item                                                                                                                                                   | Reported on page # |
|--------------------------|------------|--------------------------------------------------------------------------------------------------------------------------------------------------------|--------------------|
| <b>TITLE OR ABSTRACT</b> |            |                                                                                                                                                        |                    |
|                          | <b>1</b>   | Identification as a study of diagnostic accuracy using at least one measure of accuracy (such as sensitivity, specificity, predictive values, or AUC)  | <b>2</b>           |
| <b>ABSTRACT</b>          |            |                                                                                                                                                        |                    |
|                          | <b>2</b>   | Structured summary of study design, methods, results, and conclusions (for specific guidance, see STARD for Abstracts)                                 | <b>2</b>           |
| <b>INTRODUCTION</b>      |            |                                                                                                                                                        |                    |
|                          | <b>3</b>   | Scientific and clinical background, including the intended use and clinical role of the index test                                                     | <b>4</b>           |
|                          | <b>4</b>   | Study objectives and hypotheses                                                                                                                        | <b>5</b>           |
| <b>METHODS</b>           |            |                                                                                                                                                        |                    |
| <i>Study design</i>      | <b>5</b>   | Whether data collection was planned before the index test and reference standard were performed (prospective study) or after (retrospective study)     | <b>5</b>           |
| <i>Participants</i>      | <b>6</b>   | Eligibility criteria                                                                                                                                   | <b>5</b>           |
|                          | <b>7</b>   | On what basis potentially eligible participants were identified (such as symptoms, results from previous tests, inclusion in registry)                 | <b>5</b>           |
|                          | <b>8</b>   | Where and when potentially eligible participants were identified (setting, location and dates)                                                         | <b>5</b>           |
|                          | <b>9</b>   | Whether participants formed a consecutive, random or convenience series                                                                                | <b>5</b>           |
| <i>Test methods</i>      | <b>10a</b> | Index test, in sufficient detail to allow replication                                                                                                  | <b>5</b>           |
|                          | <b>10b</b> | Reference standard, in sufficient detail to allow replication                                                                                          | <b>6</b>           |
|                          | <b>11</b>  | Rationale for choosing the reference standard (if alternatives exist)                                                                                  | <b>6</b>           |
|                          | <b>12a</b> | Definition of and rationale for test positivity cut-offs or result categories of the index test, distinguishing pre-specified from exploratory         | <b>6</b>           |
|                          | <b>12b</b> | Definition of and rationale for test positivity cut-offs or result categories of the reference standard, distinguishing pre-specified from exploratory | <b>6</b>           |
|                          | <b>13a</b> | Whether clinical information and reference standard results were available to the performers/readers of the index test                                 | <b>6</b>           |
|                          | <b>13b</b> | Whether clinical information and index test results were available to the assessors of the reference standard                                          | <b>6</b>           |
| <i>Analysis</i>          | <b>14</b>  | Methods for estimating or comparing measures of diagnostic accuracy                                                                                    | <b>6</b>           |
|                          | <b>15</b>  | How indeterminate index test or reference standard results were handled                                                                                | <b>6</b>           |

|                          |     |                                                                                                             |                |
|--------------------------|-----|-------------------------------------------------------------------------------------------------------------|----------------|
|                          | 16  | How missing data on the index test and reference standard were handled                                      | 6              |
|                          | 17  | Any analyses of variability in diagnostic accuracy, distinguishing pre-specified from exploratory           | 7              |
|                          | 18  | Intended sample size and how it was determined                                                              | Not applicable |
| <b>RESULTS</b>           |     |                                                                                                             |                |
| <i>Participants</i>      | 19  | Flow of participants, using a diagram                                                                       | Not applicable |
|                          | 20  | Baseline demographic and clinical characteristics of participants                                           | 5              |
|                          | 21a | Distribution of severity of disease in those with the target condition                                      | Not applicable |
|                          | 21b | Distribution of alternative diagnoses in those without the target condition                                 | Not applicable |
|                          | 22  | Time interval and any clinical interventions between index test and reference standard                      | Not applicable |
| <i>Test results</i>      | 23  | Cross tabulation of the index test results (or their distribution) by the results of the reference standard | 7              |
|                          | 24  | Estimates of diagnostic accuracy and their precision (such as 95% confidence intervals)                     | Not applicable |
|                          | 25  | Any adverse events from performing the index test or the reference standard                                 | Not applicable |
| <b>DISCUSSION</b>        |     |                                                                                                             |                |
|                          | 26  | Study limitations, including sources of potential bias, statistical uncertainty, and generalisability       | 11             |
|                          | 27  | Implications for practice, including the intended use and clinical role of the index test                   | 11             |
| <b>OTHER INFORMATION</b> |     |                                                                                                             |                |
|                          | 28  | Registration number and name of registry                                                                    | 7              |
|                          | 29  | Where the full study protocol can be accessed                                                               | Not applicable |
|                          | 30  | Sources of funding and other support; role of funders                                                       | Not applicable |

**Supplementary Table S2: First positive RT-PCR cycle threshold counts and Antigen cut-off indexes of samples from RT-PCR positive cases in our real-world population.**

| Patient                         | Collection date | Roche RT-PCR (Ct Count) |        | GeneXpert RT-PCR (Ct Count) |        | SARS-CoV-2 Antigen (COI) * | Days post-first positive RT-PCR |
|---------------------------------|-----------------|-------------------------|--------|-----------------------------|--------|----------------------------|---------------------------------|
|                                 |                 | ORF gene                | E gene | N gene                      | E gene |                            |                                 |
| Negative for SARS-CoV-2 Antigen |                 |                         |        |                             |        |                            |                                 |
| A                               | 4/8/2021        | 33.27                   | 35.43  |                             |        |                            |                                 |
|                                 | 21/8/2021       |                         |        |                             |        | < 1.0                      | 17                              |
|                                 | 22/8/2021       |                         |        |                             |        | < 1.0                      | 18                              |
|                                 | 25/8/2021       |                         |        |                             |        | < 1.0                      | 21                              |
|                                 | 29/8/2021       |                         |        |                             |        | < 1.0                      | 25                              |
| B                               | 14/8/2021       | 34.28                   | 37.03  |                             |        |                            |                                 |
|                                 | 25/8/2021       |                         |        |                             |        | < 1.0                      | 9                               |
| C                               | 1/9/2021        | 23.31                   | 23.76  |                             |        |                            |                                 |
|                                 | 25/9/2021       |                         |        |                             |        | < 1.0                      | 24                              |
| D                               | 20/9/2021       |                         |        |                             |        | < 1.0                      | 0                               |
|                                 | 20/9/2021       |                         |        | 33                          | 31     |                            |                                 |
| E                               | 3/9/2021        | 27.73                   | 28.84  |                             |        |                            |                                 |
|                                 | 17/9/2021       |                         |        |                             |        | < 1.0                      | 14                              |
|                                 | 27/9/2021       |                         |        |                             |        | < 1.0                      | 24                              |
| F                               | 8/9/2021        |                         |        | 35                          | 35     |                            |                                 |
|                                 | 15/9/2021       |                         |        |                             |        | < 1.0                      | 7                               |
| G                               | 8/9/2021        |                         |        | 21                          | 18     |                            |                                 |

|                                        |           |       |       |    |    |       |    |
|----------------------------------------|-----------|-------|-------|----|----|-------|----|
|                                        | 26/9/2021 |       |       |    |    | < 1.0 | 18 |
| <b>Positive for SARS-CoV-2 Antigen</b> |           |       |       |    |    |       |    |
| H                                      | 26/9/2021 | 23.53 | 23.87 |    |    |       |    |
|                                        | 28/9/2021 |       |       |    |    | 15.7  | 2  |
| I                                      | 23/9/2021 |       |       | 19 | 16 |       |    |
|                                        | 27/9/2021 |       |       |    |    | 208   | 4  |
| J                                      | 20/9/2021 |       |       | 24 | 21 |       |    |
|                                        | 20/9/2021 |       |       |    |    | 34.7  | 0  |
| K                                      | 20/9/2021 | 27.64 | 28.01 |    |    |       |    |
|                                        | 20/9/2021 |       |       |    |    | < 1.0 | 0  |
|                                        | 27/9/2021 |       |       |    |    | 5314  | 7  |
| L                                      | 26/9/2021 | 28.77 | 29.43 |    |    |       |    |
|                                        | 28/9/2021 |       |       |    |    | 2.68  | 2  |

\* - The Cut-off Index of all Negative antigen tests are <1.0 and exact values not displayed.

Abbreviations: Ct: Cycle Threshold Count, COI: Cut-off index
